# Supplementary material
Source: HighWire-hosted journal article supplement (https://www.cmajopen.ca/highwire/filestream/84920/field_highwire_adjunct_files/3/2020-0129-original-submission.pdf)
Supplement: 2020-0129-original-submission.pdf [file 2020-0129-original-submission.pdf]

## Topical Nitroglycerin Ointment as Salvage Therapy for Peripheral Tissue Ischemia in Newborn Infants: A Systematic Review

### Authors and degrees:

Katelyn Sushko<sup>1</sup> RN, Catherine Litalien<sup>2</sup> MD, Lauren Ferruccio<sup>3</sup> PharmD, Andrea Gilpin<sup>4</sup> PhD, MBA, Maryann Mazer-Amirshahi<sup>5</sup> PharmD MD PhD, Anthony K Chan<sup>6</sup> MBBS, John van den Anker<sup>7,8</sup> MD PhD, Thierry Lacaze-Masmonteil<sup>9</sup> MD PhD, Samira Samiee-Zafarghandy<sup>10</sup> MD

<sup>1</sup> Faculty of Health Sciences, School of Nursing, McMaster University, Hamilton, Ontario, Canada.

<sup>2</sup> Division of General Pediatrics, Department of Pediatrics, and the Rosalind & Morris Goodman Family Pediatric Formulations Centre, Centre Hospitalier Universitaire Sainte-Justine, Université de Montréal, Quebec, Canada.

<sup>3</sup> Department of Pharmacy, Hamilton Health Sciences, Hamilton, Ontario, Canada.

<sup>4</sup> General Manger, Rosalind & Morris Goodman Family Pediatric Formulations Centre, Centre Hospitalier Universitaire Sainte-Justine,

<sup>5</sup> Department of Emergency Medicine, MedStar Washington Hospital Center, Georgetown University School of Medicine, Washington, DC, United States.

<sup>6</sup> Division of Pediatric Hematology/Oncology, McMaster Children's Hospital, McMaster University, Hamilton, Ontario, Canada.

<sup>7</sup> Division of Clinical Pharmacology, Department of Pediatrics, Children's National Health System, Washington, District of Columbia, United States.

<sup>8</sup> Division of Paediatric Pharmacology and Pharmacometrics, University of Basel Children's Hospital, Basel, Switzerland

<sup>9</sup> Division of Neonatology, Department of Pediatrics, University of Calgary, Alberta Children's Hospital, Alberta, Canada.

<sup>10</sup> Division of Neonatology, Department of Pediatrics, McMaster Children's Hospital, McMaster University, Hamilton, Ontario, Canada.

### Corresponding Author:

Katelyn Sushko, RN  
McMaster University  
1280 Main St West, L8S 4L8  
Hamilton, ON, Canada  
Email: sushkokj@mcmaster.ca

**Running Title:** Topical Nitroglycerin Ointment for Peripheral Tissue Ischemia in Infants

1  
2  
3  
4  
5  
6  
7  
8  
9  
10  
11  
12  
13  
14  
15  
16  
17  
18  
19  
20  
21  
22  
23  
24  
25  
26  
27  
28  
29  
30  
31  
32  
33  
34  
35  
36  
37  
38  
39  
40  
41  
42  
43  
44  
45  
46  
47  
48  
49  
50  
51  
52  
53  
54  
55  
56  
57  
58  
59  
60

**Abstract word count: 249**  
**Word count: 2,445**

Confidential

## Abstract

*Background:* Infants in the neonatal intensive care unit are at risk of peripheral tissue ischemia, which can result in limb necrosis. Off-label use of topical nitroglycerine (TNG) ointment has presented a viable treatment option for this condition. As of July 2018, production of TNG ointment has been discontinued in Canada. We aimed to systematically review the evidence on the use of TNG ointment and glyceryl trinitrate (GTN) patches in newborns with peripheral tissue ischemia and call for action on this drug shortage.

*Methods:* EMBASE, CINAHL, MEDLINE, PubMed, and Web of Science were searched from inception to April 2020 for articles that reported use of TNG ointment or GTN patch for treatment of peripheral tissue ischemia in newborns.

*Results:* We included 22 articles describing the use of TNG ointment or GTN patch in the treatment of 37 tissue ischemia events in 36 preterm and term neonates. Twenty-three infants received TNG ointment, 12 received GTN patch, and one received GTN patch and TNG ointment. Nineteen injuries treated with TNG ointment (83%) and seven treated with GTN patch (54%) showed complete recovery. Two infants treated with GTN patch experienced adverse events (methemoglobinemia) requiring early discontinuation of treatment.

*Interpretation:* TNG ointment presents a safe therapeutic option for salvage therapy of tissue ischemia in newborns. Its lack of availability can result in life-altering morbidities or use of unsuited alternatives with suboptimal efficacy and high risk of serious adverse events. The timely engagement of stakeholders is essential to address this important drug shortage in Canada.

## Introduction

Extremely low birth weight (ELBW) infants in the Neonatal Intensive Care Unit (NICU), require venous with or without arterial cannulation to maintain their therapeutic needs. Although these interventions are “*non-negotiable*,” peripheral tissue ischemia is a well-described complication of vascular catheterization. Peripheral tissue ischemia is primarily attributed to iatrogenic causes, including extravasation of intravenously administered medication, peripheral vasospasm, or a thromboembolic event secondary to percutaneous arterial access.<sup>1,2</sup> Tissue injury mediated by arterial and venous catheterization presents significant morbidity among NICU graduates. The evidence on the incidence of any peripheral tissue ischemia among NICU survivors is variable but has been reported in up to 10% of ELBW infants, while up to 4% can suffer from severe tissue injuries or necrosis.<sup>3,4,5,6</sup>

The current approach to peripheral tissue ischemia in neonates is mainly limited to conservative treatment including removal of the device, elevation of the affected limb, and application of warmth to the opposite limb (reflex vasodilatation) with variable success.<sup>1</sup> Although antithrombotic and fibrinolytic agents as non-operative approach are promising therapeutic options in older children, their use in sick neonates of NICU is limited due to risk of serious bleeding.<sup>7</sup> Glyceryl trinitrate (GTN) patch and topical nitroglycerine (TNG) ointment with labelled indications of treatment of angina pectoris or pain associated with chronic anal fissure in adults have been used, off-label, as salvage therapy for tissue ischemia in neonates since the 1980s. In July 2018, the Canadian manufacturer discontinued the production of TNG ointment. We thus aimed to systematically review the available literature on the use of TNG ointment and GTN patch in newborn infants with peripheral tissue ischemia to address the potential impact of this drug shortage in Canada.

## Methods

### Reporting guidelines

This review was carried out as per the Preferred Reporting Items for Systematic Reviews and Meta-Analyses (PRISMA) statement.<sup>8</sup> The protocol for this systematic review was not published.

### Search strategy

The database EMBASE, CINAHL, MEDLINE, PubMed, and Web of Science were systematically searched from inception to April 2020. A search strategy for the electronic literature search in *Ovid Medline*, using the following key terms was performed: (intensive care units, neonatal/ OR intensive care, neonatal/ OR infant, newborn OR infant, premature/) AND (nitroglycerine/ OR glyceryl trinitrate.mp). This strategy was translated as appropriate for the other databases. We searched the bibliographies of any relevant articles for additional references. Using Google Scholar, we also searched for studies that are not commercially published, such as conference abstracts, dissertations, and policy documents. We did not apply any language or study design limitation. Animal studies and duplicate studies were excluded.

### Study selection

All randomized controlled trials (RCTs), prospective and retrospective cohort studies, and case reports describing the use of TNG ointment or GTN patch in the treatment of tissue ischemia in hospitalized newborn infants of any gestational age and postnatal age were eligible for inclusion, irrespective of the dose, administration frequency and duration of treatment. Standard practice was the comparator in studies with a control group. If there was no comparator group, the reported efficacy and safety of TNG ointment or GTN patch during the observation period were extracted.

### Data extraction

Following the database searches, two independent reviewers (KS and SSZ) screened the eligibility of the resulting articles at the title and abstract level and then at the full-text level.

After identification of all studies to be included in the final review, the following data were extracted from each study using a standardized data collection form: first author, year of publication, study design, number of cases, infant gestational age, infant postnatal age, cause(s) of ischemia, ischemic site(s), the lag time between initiation of TNG ointment or GTN patch treatment and tissue injury, type of nitroglycerine preparation (ointment or patch), dose, time to the first effect defined as the time between the start of TNG ointment or GTN patch therapy and the first signs of improved perfusion recorded by the responsible care provider, treatment duration, adjunctive pharmacotherapy, primary outcome defined as complete recovery or no complete recovery, and adverse events.

### Data quality assessment

We used the Critical Appraisal Checklist for Case Reports by the Joanna Briggs Institute (JBI)<sup>9</sup> to assess the risk of bias of individual studies, as all included studies, except for one retrospective audit, were case reports. Using the aforementioned tool, each study was evaluated to determine whether it provided a clear description of the following items: patient demographic characteristics, patient history, clinical condition, diagnostic tests and assessment methods along with their relevant findings, interventions or treatment procedures, post-intervention clinical condition, adverse or unanticipated events; and takeaway lessons. All studies were independently assessed by two reviewers (KS and SSZ). Any disagreements were resolved by discussion between three reviewers (KS, SSZ and CL).

### Data analysis

1  
2  
3 As none of the included articles presented effect estimate statistics, a meta-analysis was  
4 not conducted. Instead, the results were summarized and presented narratively.  
5  
6

#### 7 8 Ethics approval

9  
10 We did not seek institutional ethics approval as our study did not constitute primary  
11 research and involved the access of publicly available evidence.  
12  
13

## 14 15 **Results**

16  
17 A total of 741 articles were identified as a result of all database searches, a review of  
18 relevant reference lists, and a grey literature search (Figure 1). Following deduplication, 438  
19 articles were screened at the title and abstract level and 23 were screened at the full-text level.  
20  
21 Twenty-two studies<sup>10-31</sup> were included in the final review. All articles, except for one were case  
22 reports. The remaining article was an abstract of a retrospective audit. Extracted data are  
23 summarized in Table 1.  
24  
25

#### 26 27 28 29 30 31 Characteristics of studies

##### 32 33 Newborn infants and injuries

34  
35 We identified 22 studies describing 36 neonates with 37 peripheral tissue ischemic events  
36 treated with TNG ointment (n = 23, 63.9%), GTN patches (n = 12, 33.3%), or both (n = 1, 2.8%)  
37 (Table 1). The majority of infants were extremely or very preterm (n = 24, 66%) and within the  
38 first two weeks of life at the time of injury (n = 25, 69%). Placement of an umbilical artery  
39 catheter or peripheral arterial line was the most common cause of identified tissue ischemia (n =  
40 20, 54%), followed by intravenous drug administration (n = 5, 14%).  
41  
42  
43  
44  
45  
46  
47  
48

##### 49 Treatment details

##### 50 51 *TNG ointment*

1  
2  
3 Twenty-three infants received TNG ointment for 25 peripheral tissue ischemic  
4 events.<sup>11,12,14-15,18-22,24,25,27,28,30,31</sup> The time for initiation of treatment had a delay of up to 6 days.  
5  
6 The time from application to first effect varied from 15 minutes after application to 23 days.  
7  
8 Treatment duration ranged from one dose to 36 days with 19 (83%) injuries showing complete  
9 recovery.<sup>11,12,14-15,20,22,24,25,27,30,31</sup> Four adverse events were reported in infants treated with TNG  
10 ointment, three in the form of mild blood pressure and heart rate changes that resolved without  
11 discontinuation of treatment, and one occurrence of swelling bulla that resolved with the  
12 application of Xeroform gauze and limb elevation.<sup>12,14,19</sup> Six of the infants treated with TNG  
13 ointment received adjunctive therapy which included tissue plasminogen activator (tPA),  
14 heparin, intravenous nitroglycerine, 100% humidity, and milrinone.<sup>19,22,24,27,28,30</sup> One infant that  
15 experienced embolization of a broken arterial catheter tip was first treated by removing the  
16 catheter fragment using angiography.<sup>22</sup>

### 30 *GTN patch*

31  
32  
33 Twelve infants received GTN patches for 13 peripheral tissue ischemic  
34 events.<sup>10,13,16,23,26,29</sup> Time of application of GTN patch after tissue injury ranged from  
35 immediately to 12 hours after the injury. The maximum duration of treatment was seven days,  
36 with GTN discontinued in three peripheral tissue injuries due to serious adverse events.<sup>29</sup> Seven  
37 of the 13 injuries showed a completed recovery (54%).<sup>10,13,16,23,26,29</sup> Six of the ten infants treated  
38 with the GTN patch received adjunctive therapies which included enoxaparin, heparin, and  
39 tPA.<sup>23,26</sup>

40  
41  
42 Methemoglobinemia was the described adverse event subsequent to the use of the GTN  
43 patch in two infants.<sup>29</sup> In both cases, a 9 cm<sup>2</sup> patch (18.7 mg) was applied to the sites of  
44 peripheral tissue injuries. The first neonate received three GTN patches for two peripheral tissue  
45  
46  
47  
48  
49  
50  
51  
52  
53  
54  
55  
56  
57  
58  
59  
60



1  
2  
3 ischemic events (one spontaneous post-birth and one after a PAL insertion) over 48 hours. Two  
4 patches were applied on the first day of life and the third patch was applied on the second day of  
5 life. Within six hours following the application of the third patch, the infant's oxygen  
6 requirements increased from 0.21 to 0.40 and methemoglobin levels rose from 1.1% to 8.4%. In  
7 the second case, GTN patches were applied for peripheral tissue injury following a PAL  
8 insertion. One patch was applied on the third day of life and changed daily until the seventh day  
9 of life when two patches were applied and changed twice daily, with a total of ten patches used  
10 in five days. Within 24 hours of the application of two patches on the seventh day of life, the  
11 infant's oxygen requirements increased from 0.23 to 0.70 and methemoglobin levels increased to  
12 23.3%. Symptoms of methemoglobinemia ceased within 24 hours of patch removal. One other  
13 infant experienced a mild decrease in blood pressure, which resolved with adjustment of  
14 inotropic support.<sup>13</sup>

### 31 *GTN patch and TNG ointment*

32  
33 One infant was treated with both GTN patch and TNG ointment.<sup>17</sup> In this case, the patch  
34 was applied to the injury for five days as an alternative to TNG ointment as it was unavailable.  
35 Once the ointment was available, the patch was removed and ointment was applied for 11 days,  
36 along with an antibiotic cream. Following ointment application, rapid improvement was  
37 observed with increased vascularization and hyperemia of the ischemic tissue. No adverse events  
38 occurred throughout treatment with either the patch or ointment. Following treatment, partial loss  
39 of the distal phalange of one finger and one toe remained.

### 49 Risk of bias assessment

50  
51 All studies met at least six of the eight criteria of the JBI appraisal tool. Fourteen of the  
52 included studies met all the eight criteria, with six missing only one criterion (Table 2).  
53  
54  
55  
56  
57  
58  
59  
60

## Interpretation

In this systematic review, the efficacy of TNG ointment in newborn infants appears favorable, with 83% of tissue ischemic events treated with ointment experiencing complete recovery.<sup>18,19,21,28</sup> In the four cases where recovery was incomplete, extenuating circumstances might have mitigated the ointment's efficacy. In one case, the infant had reduced limb movement and reflexes with muscle atrophy at discharge as a result of Purple Glove Syndrome<sup>28</sup>, a rare condition that has been known to progress to vascular compression and compartment syndrome requiring fasciotomy, skin grafting, or amputation in adults. The underlying pathology of Purple Glove Syndrome is poorly understood but it has been hypothesized to occur as a result of several mechanisms from tissue infiltration via extravasation of a highly alkaline substance (phenytoin) to venous obstruction following reaction of phenytoin with the more neutral pH of blood.<sup>32</sup> The application of TNG ointment may not be sufficient given this complex pathology. In the remaining cases, short duration of treatment or prolonged lag time in start of treatment might have contributed to insufficient recovery.<sup>18,19,21</sup>

Based on the available evidence, TNG ointment seems to be well tolerated in preterm and term neonates, with no significant adverse event reported with this therapy in this population. Reports of mild decrease in blood pressure were in infants already receiving inotropes for blood pressure support before TNG ointment application<sup>12,14</sup>, which may suggest that TNG ointment was not the only factor contributing to hypotension. The results of our review point towards efficacy with minimal adverse events in the use of TNG ointment for treating neonatal peripheral tissue ischemia.

In contrast, there appeared to be a lack of efficacy as well as an occurrence of serious adverse events among the infants treated with GTN patches. In this review, almost half of the 13

1  
2  
3 tissue injuries treated with a GTN patch did not experience a complete recovery<sup>10,13,23,26,29</sup> and in  
4  
5 two infants, serious adverse events of methemoglobinemia occurred, requiring treatment to be  
6  
7 discontinued early.<sup>29</sup> While GTN patches may be more effective and/or safe in pediatric or adult  
8  
9 populations<sup>33,34</sup>, the available evidence does not support its use in neonates.

## 12 Limitations

14  
15 To our knowledge, this is the first review to have summarized the entirety of the available  
16  
17 literature on ointment and patch formulations of nitroglycerine products for salvage therapy in  
18  
19 neonatal tissue ischemia. This allowed us to describe the neonatal outcomes across these  
20  
21 therapies as well as to examine their safety. However, our review also has limitations. Due to the  
22  
23 methodology of the available literature (primarily case reports), our review consisted of studies  
24  
25 that are at the lowest level of medical evidence. As such, they are subject to vulnerabilities  
26  
27 including a lack of ability to generalize, danger of over-interpretation, publication bias, and  
28  
29 inability to establish a cause-effect relationship. To further the literature on this topic, future  
30  
31 studies may use methods such as the cohort design.

## 35 Call to action for TNG in Canada

37  
38 National drug shortage are known as a serious threat to patient safety and quality of care,  
39  
40 especially for vulnerable patients of NICUs.<sup>35</sup> Indefinite discontinuation of TNG ointment in  
41  
42 Canada is one clear example of how this important drug shortage may pose serious health risks.  
43  
44 Although no randomized clinical trials are available, the available evidence on the use of TNG  
45  
46 ointment in neonates with peripheral tissue ischemia has supported its efficacy with no reported  
47  
48 serious adverse events. On the contrary, the limited available evidence on the use of GTN  
49  
50 patches as an alternative pharmacotherapy has shown either a lack of efficacy or an occurrence  
51  
52 of serious adverse events.  
53  
54

1  
2  
3 Peripheral tissue ischemia is a well-known and serious morbidity among ELBW infants.  
4  
5 The low weight and high rate of comorbidities makes most available therapeutic options, in older  
6  
7 children and adults, less viable in this population. Surgical or radiological thrombo-embolctomy  
8  
9 is not considered an option for ELBW neonates.<sup>37</sup> The use of thrombolytic agents or  
10  
11 anticoagulants is a challenge, considering the limited experience and high-risk of potential  
12  
13 adverse events, especially in the first week of life.<sup>38</sup> Therefore, critically ill infants in the NICU  
14  
15 with a limb-threatening acute event present a therapeutic challenge. To our knowledge, TNG  
16  
17 ointment continues to be marketed in developed jurisdictions such as the United States and the  
18  
19 United Kingdom, where, although off-label, it remains available for prevention of this potentially  
20  
21 life-altering morbidity in their sick neonates. Discontinuation of TNG ointment in Canada due to  
22  
23 its limited economic viability will single us out in this important drug shortage and can adversely  
24  
25 affect the care of patients in Canadian NICUs.<sup>39,40</sup>  
26  
27  
28  
29

### 30 **Conclusions**

31  
32  
33 Although no clinical trials exist, the available literature support the efficacy and safety  
34  
35 profile of TNG ointment as a salvage therapy of peripheral tissue ischemia in neonates. With the  
36  
37 indefinite discontinuation of TNG ointment by the Canadian manufacture, critically ill infants  
38  
39 have lost a valuable therapeutic option with no comparable alternative. We are calling for  
40  
41 attention to the severity of the impact that the indefinite discontinuation of this drug might have  
42  
43 on the care of ELBW infants in Canada and ask for timely engagement of stakeholders to address  
44  
45 this important matter for this vulnerable population.  
46  
47  
48  
49  
50  
51  
52  
53  
54  
55  
56  
57  
58  
59  
60

1  
2  
3 **Conflict of interest**  
4

5 The authors received no financial support for the research, authorship, and/or publication of this  
6 article, and report no conflicts of interest.  
7  
8

9  
10 **Acknowledgements**  
11

12 We thank Megan Fournier and Vivian Bui, pharmacists at McMaster Children's Hospital, and  
13 Gerhard Fusch, Assistant Professor in the Department of Pediatrics, for their contributions in  
14 identifying this drug shortage.  
15  
16  
17  
18  
19  
20  
21  
22  
23  
24  
25  
26  
27  
28  
29  
30  
31  
32  
33  
34  
35  
36  
37  
38  
39  
40  
41  
42  
43  
44  
45  
46  
47  
48  
49  
50  
51  
52  
53  
54  
55  
56  
57  
58  
59  
60

Confidential

## References

1. Arshad A, McCarthy MJ. Management of Limb Ischaemia in the Neonate and Infant. *Eur J Vasc Endovasc Surg*. 2009;38(1):61-65. doi:10.1016/j.ejvs.2009.03.010
2. Corbett M, Marshall D, Harden M, Oddie S, Phillips R, McGuire W. Treating extravasation injuries in infants and young children: A scoping review and survey of UK NHS practice. *BMC Pediatr*. 2019;19(1):1-7. doi:10.1186/s12887-018-1387-1
3. Wilkins CE, Emmerson AJB. Extravasation injuries on regional neonatal units. *Arch Dis Child Fetal Neonatal Ed*. 2004;89(3):274-275. doi:10.1136/adc.2003.028241
4. Kostoglou N, Demiri E, Tsimponis A, et al. Severe Extravasation Injuries in Neonates: A Report of 34 Cases. *Pediatr Dermatol*. 2015;32(6):830-835. doi:10.1111/pde.12664
5. Cartilidge P, Fox P, Rutter N. The scars of newborn intensive care. *Early Hum Dev*. 1990;21(1):1-10. doi:10.1016/0378-3782(90)90105-r
6. Paquette V, McGloin R, Northway T, DeZorzi P, Singh A, Carr R. Describing intravenous extravasation in children (DIVE study). *Can J Hosp Pharm*. 2011;64(5):340-345. doi:10.4212/cjhp.v64i5.1069
7. Szvetko A, Hurrión E, Dunn A, Fasihullah S, Withers S. Axillary Artery Thrombosis in a Neonate In Utero : A Case Report . *Case Rep Pediatr*. 2014;2014:1-6. doi:10.1155/2014/417147
8. Liberati A, Altman DG, Tetzlaff J, et al. The PRISMA statement for reporting systematic reviews and meta-analyses of studies that evaluate healthcare interventions: explanation and elaboration. *BMJ*. 2009;339. doi:10.1136/bmj.b2700
9. Moola S, Munn Z, Tufanaru C, et al. Chapter 7: Systematic reviews of etiology and risk. In: Aromataris E, Munn Z, eds. *Joanna Briggs Institute Reviewer's Manual*. The Joanna Briggs Institute; 2017. <https://reviewersmanual.joannabriggs.org/>.
10. O'Reilly C, McKay F, Duffy P, Lloyd D. Glyceryl trinitrate in skin necrosis caused by extravasation of parenteral nutrition. *Lancet*. 1988;2(8610):565-566. doi:10.1016/s0140-6736(88)92682-7
11. Denkler K, Cohen B. Reversal of dopamine extravasation injury with topical nitroglycerin ointment. *Plast Reconstr Surg*. 1989;84(5):811-813. doi:10.1097/00006534-198911000-00017
12. Wong AF, McCulloch LM, Sola A. Treatment of peripheral tissue ischemia with topical nitroglycerin ointment in neonates. *J Pediatr*. 1992;121(6):980-983. doi:10.1016/S0022-3476(05)80356-7
13. Varughese M, Koh THHG. Successful use of topical nitroglycerine in ischaemia associated with umbilical arterial line in a neonate. *J Perinatol*. 2001;21(8):556-558. doi:10.1038/sj.jp.7210567
14. Baserga M, Puri A, Sola A. The use of topical nitroglycerine ointment to treat peripheral tissue ischemia secondary to arterial line complications in neonates. *J Perinatol*. 2002;22(5):416-419. doi:10.1038/sj.jp.7210713
15. Vasquez P, Burd A, Mehta R, Hiatt M, Hegyi T. Resolution of peripheral artery catheter-induced ischemic injury following prolonged treatment with topical nitroglycerin ointment in a newborn: A case report. *J Perinatol*. 2003;23(4):348-350. doi:10.1038/sj.jp.7210870
16. Maffei G, Rinaldi M, Rinaldi G. Resolution of peripheral tissue ischemia secondary to arterial vasospasm following treatment with a topical nitroglycerin device in two newborns: Case reports [4]. *J Perinat Med*. 2006;34(3):252. doi:10.1515/JPM.2006.047

17. Ancora G, Soffritti S, Faldella G. Diffuse and severe ischemic injury of the extremities: A complication of umbilical vein catheterization. *Am J Perinatol.* 2006;23(6):341-344. doi:10.1055/s-2006-946721
18. Mousavi SA, Sahebpour AA, Shahmohammadi S. Neonatal gangrene of the extremity: A complication of umbilical catheterization. *Pakistan J Med Sci.* 2010;26(2):488-489.
19. Akingbola O, Singh D, Steiner R, Frieberg E, Petrescu M. High-dose tissue plasminogen activator, topical nitroglycerin, and heparin for severe ischemic injury in a neonate. *Clin Pediatr (Phila).* 2012;51(11):1095-1098. doi:10.1177/0009922811423312
20. Mosalli R, Elbaz M, Paes B. Topical Nitroglycerine for Neonatal Arterial Associated Peripheral Ischemia following Cannulation: A Case Report and Comprehensive Literature Review. *Case Rep Pediatr.* 2013;2013:1-7. doi:10.1155/2013/608516
21. Samiee-Zafarghandy S, Van Den Anker JN, Ben Fadel N. Topical nitroglycerin in neonates with tissue injury: A case report and review of the literature. *Paediatr Child Heal.* 2014;19(1):9-12. doi:10.1093/pch/19.1.9
22. Dilli D, D M, Özyazici E, et al. Rupture and displacement of umbilical catheter: bilateral arterial occlusion in VLBW preterm. *Arch Argent Pediatr.* 2015;113(5):283-285. doi:10.5546/aap.2015.eng.e283
23. Teo MC, Shah VA. Digital ischaemia following inadvertent arterial cannulation of a peripherally inserted central catheter in a very low birth weight infant. *Singapore Med J.* 2015;56(8):482-483. doi:10.11622/smedj.2015125
24. Parra D, Zuker R, Connolly B. Brachial pseudoaneurysm of the neonate with partial response to thrombin injections and late spontaneous thrombosis and regression during expectant management. *BJR|case reports.* 2016;2(3):20150383. doi:10.1259/bjrcr.20150383
25. Vivar del Hoyo P, Sánchez Ruiz P, Ludeña del Río M, López-Menchero Oliva JC, García Cabezas MÁ. Nitroglicerina tópica en neonatos con lesiones isquémicas tras canalización de vasos. *An Pediatr.* 2016;85(3):155-156. doi:10.1016/j.anpedi.2016.01.024
26. Yong J, Rajan C, Molnar Z, et al. Single UK tertiary neonatal unit experiences of neonatal arterial thrombosis. *Br J Haematol.* 2016;173(Suppl. 1):5-178. doi:10.1111/bjh.14019
27. Han Y-S, Song S, Sung T-J, Chun J. Successful management of severe peripheral tissue ischemia after arterial catheterization in micro preemies using humidification and topical nitroglycerin. *Neonatal Med.* 2017;24(4):197. doi:10.5385/nm.2017.24.4.197
28. Işık DU, Demirel N, Erol S, Ünal S, Baş AY. A rare complication of phenytoin infusion in newborn: Purple glove syndrome. *Balkan Med J.* 2017;34(6):584-585. doi:10.4274/balkanmedj.2017.0480
29. Mintoft A, Williams E, Harris C, Kennea N, Greenough A. Methemoglobinemia during the use of glyceryl trinitrate patches in neonates: Two case reports. *AJP Rep.* 2018;8(4):e227-e229. doi:10.1055/s-0038-1669945
30. Kuttysankaran R, Ramaiah S, Popescu O. Spontaneous femoral artery thrombosis in a newborn infant – case report. *Perinatologia.* 2018;1(1):22-24. doi:10.26416/peri.2.1.2018.1649
31. Weerasekera M, Lakmini C, Imbulana NS, Hettiarachchi KR, Sampath GU. Topical nitroglycerine in management of peripheral ischaemia in a neonate following arterial cannulation. *Sri Lanka J Child Heal.* 2019;48(3):263-265. doi:10.4038/sljch.v48i3.8765
32. Okogbaa JI, Onor IO, Arije OA, Harris MB, Lillis RA. Phenytoin-induced purple glove syndrome: A case report and review of the literature. *Hosp Pharm.* 2015;50(5):391-395.

- 1  
2  
3 doi:10.1310/hpj5005-391  
4 33. Morrison F, Fairhurst J, Fairhurst C. Case series: Use of Glyceryl Trinitrate patches to  
5 improve peripheral circulation in children with severe neurodisability. *Eur J Paediatr*  
6 *Neurol.* 2018;22(3):451-456. doi:10.1016/j.ejpn.2017.12.018  
7  
8 34. Boyce L, Dhukaram V. Transdermal glyceryl trinitrate in the treatment of ischemia  
9 following toe deformity correction: A case series. *Foot Ankle Int.* 2014;35(11):1226-1230.  
10 doi:10.1177/1071100714546887  
11 35. Ziesenitz VC, Fox E, Zocchi M, Samiee-Zafarghandy S, Van Den Anker JN, Mazer-  
12 Amirshahi M. Prescription Drug Shortages: Impact on Neonatal Intensive Care.  
13 *Neonatology.* 2019;115(2):108-115. doi:10.1159/000493119  
14 36. De Carolis MP, Bersani I, Piersigilli F, et al. Peripheral nerve blockade and neonatal limb  
15 ischemia: Our experience and literature review. *Clin Appl Thromb.* 2014;20(1):55-60.  
16 doi:10.1177/1076029612458968  
17 37. Ulrich T, Ellsworth M, Lang T. Emergent Thrombectomy in a Neonate with an Upper  
18 Extremity Arterial Thrombus. *Am J Perinatol Reports.* 2014;4(01):041-044.  
19 doi:10.1055/s-0034-1370355  
20 38. Kayiran PG, Gürakan B, Kayiran SM. Successful treatment of arterial thrombus in an  
21 extremely low-birth-weight preterm neonate. *Pediatr Neonatol.* 2013;54(1):60-62.  
22 doi:10.1016/j.pedneo.2012.10.006  
23 39. Drugs @FDA: FDA-Approved Drugs. Retrieved on May 22, 2020 from:  
24 [https://www.accessdata.fda.gov/scripts/cder/daf/index.cfm?event=overview.process&App](https://www.accessdata.fda.gov/scripts/cder/daf/index.cfm?event=overview.process&AppINo=087355)  
25 [INo=087355](https://www.accessdata.fda.gov/scripts/cder/daf/index.cfm?event=overview.process&AppINo=087355)  
26  
27 40. Cellegy Pharmaceuticals, Inc. Cellegy Reports Sale of Cellegy Australia to Epsilon  
28 Pharmaceuticals. Retrieved on May 25, 2020 from:  
29 [https://www.sec.gov/Archives/edgar/data/887247/000114420406015377/v040547\\_ex99-](https://www.sec.gov/Archives/edgar/data/887247/000114420406015377/v040547_ex99-)  
30 [1.htm](https://www.sec.gov/Archives/edgar/data/887247/000114420406015377/v040547_ex99-)  
31  
32  
33  
34  
35  
36  
37  
38  
39  
40  
41  
42  
43  
44  
45  
46  
47  
48  
49  
50  
51  
52  
53  
54  
55  
56  
57  
58  
59  
60



Fig. 1: PRISMA Flow Diagram

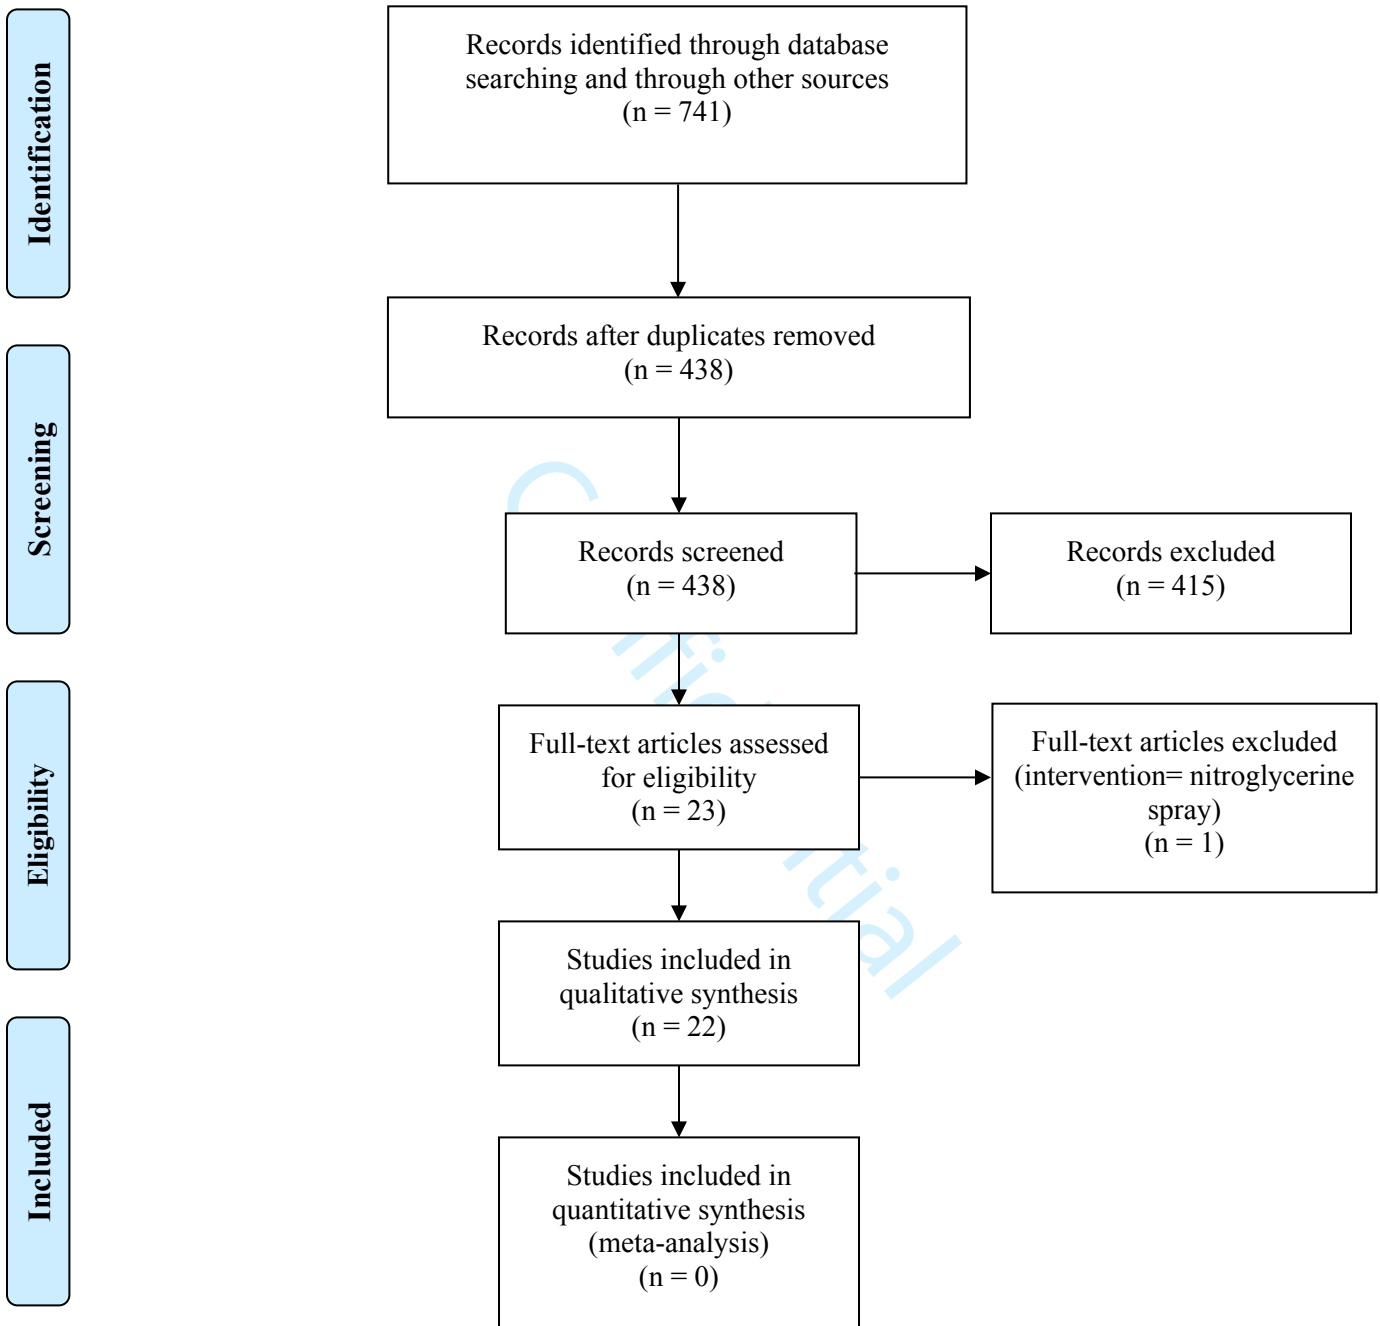

**Table 1.**  
**Use of topical nitroglycerine ointment and glyceryl trinitrate patch in neonatal peripheral tissue ischemia: Available evidence**

| First author (reference), year         | No. of cases | GA, weeks | PNA, days | Cause of ischemia      | Ischemic site                               | Time, h*  | Dose      | Time to first effect | Treatment duration | Outcome                       | Adverse events |
|----------------------------------------|--------------|-----------|-----------|------------------------|---------------------------------------------|-----------|-----------|----------------------|--------------------|-------------------------------|----------------|
| <i>Topical nitroglycerine ointment</i> |              |           |           |                        |                                             |           |           |                      |                    |                               |                |
| Denkler (11), 1989                     | 1            | 34        | 1         | Dopamine extravasation | Left hand to low forearm, left foot to knee | 6         | 14 mm/kg† | Minutes              | 1 dose             | CR                            | No             |
| Wong (12), 1992                        | 4            | 25        | 10        | PAL                    | Right hand                                  | 2         | 4 mm/kg   | 15 min               | 1 dose             | CR                            | No             |
|                                        |              | 24        | 40        | PAL                    | Right hand                                  | Within 24 | 4 mm/kg   | 8 h                  | 12 h               | CR                            | ↓BP            |
|                                        |              | 31        | 4         | Dopamine extravasation | Forearm,                                    | 1         | 4 mm/kg   | 15 min               | 1 dose             | CR                            | No             |
|                                        |              | 26        | 15        | Dopamine extravasation | chest, axilla<br>Forearm, arm               | 0.5       | 4mm/kg    | 8 h                  | 24 h               | CR                            | ↓BP, ↑HR       |
| Baserga (14), 2002                     | 3            | 30        | 1         | UAC                    | Left leg,                                   | 1         | 4 mm/kg   | 30 min               | 1 dose             | CR                            | No             |
|                                        |              | 25        | 1         | UAC                    | penis,                                      | 1.5       | 4 mm/kg   | 45 min               | 1 dose             | CR                            | No             |
|                                        |              | 23        | 10        | PAL                    | scrotum<br>Right leg<br>Left hand           | 1         | 4 mm/kg   | 30 min               | 1 dose             | CR                            | ↓BP            |
| Vasquez (15), 2003                     | 1            | 26        | 1         | PAL                    | Left hand                                   | 7         | <4 mm/kg  | 8 h                  | 27 days            | CR                            | No             |
| Mousavi (18), 2010                     | 1            | 32        | 2         | UVC                    | Right leg and foot                          | NS        | 4 mm/kg   | NR                   | NS                 | Death                         | No             |
| Akingbola (19), 2012¶                  | 1            | 31        | 60        | PAL                    | Left leg, foot, and toes                    | Within 24 | 4 mm/kg   | 24 h                 | 21 days            | Loss of tip of left great toe | Swelling bulla |
| Mosalli (20), 2013                     | 1            | 25        | 14        | PAL                    | Right fingers                               | NS        | < 4mm/kg  | 8 h                  | 21                 | CR                            | No             |
| Samiee-Zafarghandy (21), 2014          | 1            | 26        | 1.5       | PIV                    | Left foot                                   | 144       | 4 mm/kg   | 24 h                 | 14 days            | Lost second and third toes    | No             |
| Dilli (22), 2015#                      | 1            | 28        | 5         | UAC                    | Lower limbs                                 | NS        | 4 mm/kg   | 3 days               | 15                 | CR                            | No             |

|    |                                         |   |      |              |                                          |                           |                                     |                                                   |          |              |                                                        |                                        |  |
|----|-----------------------------------------|---|------|--------------|------------------------------------------|---------------------------|-------------------------------------|---------------------------------------------------|----------|--------------|--------------------------------------------------------|----------------------------------------|--|
| 1  |                                         |   |      |              |                                          |                           |                                     |                                                   |          |              |                                                        |                                        |  |
| 2  |                                         |   |      |              |                                          |                           |                                     |                                                   |          |              |                                                        |                                        |  |
| 3  | Parra (24),<br>2016††                   | 1 | 32   | 49           | Thrombin injection into PSA sac          | Right arm                 | NS                                  | NS                                                | NS       | NS           | CR                                                     | No                                     |  |
| 4  |                                         |   |      |              |                                          |                           |                                     |                                                   |          |              |                                                        |                                        |  |
| 5  | Vivar del<br>Hoyo (25),<br>2016         | 4 | 24   | NS           | UAC/UVC                                  | Toes                      | First hours<br>after<br>ischemia    | 4 mm/kg                                           | NS       | 5-18         | CR                                                     | No                                     |  |
| 6  |                                         |   |      |              |                                          |                           |                                     |                                                   |          |              |                                                        |                                        |  |
| 7  |                                         |   | 35   |              | PICC                                     | Fingers                   |                                     |                                                   |          |              |                                                        |                                        |  |
| 8  |                                         |   | >37  |              | PICC                                     | Fingers                   |                                     |                                                   |          |              |                                                        |                                        |  |
| 9  |                                         |   | >37  |              | PICC                                     | Fingers                   |                                     |                                                   |          |              |                                                        |                                        |  |
| 10 |                                         |   |      |              |                                          |                           |                                     |                                                   |          |              |                                                        |                                        |  |
| 11 | Han (27),<br>2017§§                     | 1 | 24   | 5            | PAL                                      | Upper limb                | 48                                  | 4 mm/kg                                           | 23 days‡ | 36           | CR                                                     | No                                     |  |
| 12 |                                         |   |      |              |                                          |                           |                                     |                                                   |          |              |                                                        |                                        |  |
| 13 | Isik (28),<br>2017¶¶                    | 1 | 34   | NS           | PIV phenytoin infusion                   | Upper limb                | NS                                  | NS                                                | Weeks    | NS           | Reduced<br>movement/<br>reflexes,<br>muscle<br>atrophy | No                                     |  |
| 14 |                                         |   |      |              |                                          |                           |                                     |                                                   |          |              |                                                        |                                        |  |
| 15 |                                         |   |      |              |                                          |                           |                                     |                                                   |          |              |                                                        |                                        |  |
| 16 |                                         |   |      |              |                                          |                           |                                     |                                                   |          |              |                                                        |                                        |  |
| 17 | Kuttysankaran<br>(30), 2018             | 1 | Term | 1            | Spontaneous femoral artery<br>thrombosis | Lower limb                | NS                                  | NS                                                | 2 days   | 4            | CR                                                     | No                                     |  |
| 18 |                                         |   |      |              |                                          |                           |                                     |                                                   |          |              |                                                        |                                        |  |
| 19 | Weeraskera<br>(31), 2019##              | 1 | 26   | 5            | PIV                                      | Fingers                   | NS                                  | 4 mm/kg                                           | 18 hours | 14           | CR                                                     | No                                     |  |
| 20 |                                         |   |      |              |                                          |                           |                                     |                                                   |          |              |                                                        |                                        |  |
| 21 |                                         |   |      |              |                                          |                           |                                     |                                                   |          |              |                                                        |                                        |  |
| 22 | <b><i>Glyceryl trinitrate patch</i></b> |   |      |              |                                          |                           |                                     |                                                   |          |              |                                                        |                                        |  |
| 23 | O'Reilly (10),<br>1988                  | 1 | NS   | NS           | TPN extravasation                        | Dorsum of<br>foot         | 2.5                                 | 0.2 mg                                            | NS       | 1 h          | CR                                                     | No                                     |  |
| 24 |                                         |   |      |              |                                          |                           |                                     |                                                   |          |              |                                                        |                                        |  |
| 25 | Varughese<br>(13),<br>2001              | 1 | 33   | 10           | UAC                                      | Right hip                 | 4                                   | 0.4 mg                                            | 7 h      | 30 h         | CR                                                     | JBP                                    |  |
| 26 |                                         |   |      |              |                                          |                           |                                     |                                                   |          |              |                                                        |                                        |  |
| 27 |                                         |   |      |              |                                          |                           |                                     |                                                   |          |              |                                                        |                                        |  |
| 28 | Maffei (16),<br>2006                    | 2 | 29   | 1            | Central venous catheter                  | Left arm                  | 0.5                                 | 1 cm <sup>2</sup>                                 | 1 h      | 7 days       | CR                                                     | No                                     |  |
| 29 |                                         |   | 32   | 8            | PAL                                      | Right arm                 | 1                                   | patch of<br>Triniplas<br>5mg/7<br>cm <sup>2</sup> | 3 h      | 4 days       | CR                                                     | No                                     |  |
| 30 |                                         |   |      |              |                                          |                           |                                     |                                                   |          |              |                                                        |                                        |  |
| 31 |                                         |   |      |              |                                          |                           |                                     |                                                   |          |              |                                                        |                                        |  |
| 32 |                                         |   |      |              |                                          |                           |                                     |                                                   |          |              |                                                        |                                        |  |
| 33 | Teo (23),<br>2015**                     | 1 | 32   | NS           | PICC                                     | Upper limb                | 12 h after<br>heparin<br>initiation | NS                                                | 5 days   | 7            | CR                                                     | No                                     |  |
| 34 |                                         |   |      |              |                                          |                           |                                     |                                                   |          |              |                                                        |                                        |  |
| 35 |                                         |   |      |              |                                          |                           |                                     |                                                   |          |              |                                                        |                                        |  |
| 36 | Yong (26),<br>2016‡‡                    | 5 | <31  | <14 -<br>>28 | PAL                                      | NS                        | NS                                  | NS                                                | NS       | NS           | 4 NR<br>1 CR                                           | No                                     |  |
| 37 |                                         |   |      |              |                                          |                           |                                     |                                                   |          |              |                                                        |                                        |  |
| 38 |                                         |   |      |              |                                          |                           |                                     |                                                   |          |              |                                                        |                                        |  |
| 39 |                                         |   |      |              |                                          |                           |                                     |                                                   |          |              |                                                        |                                        |  |
| 40 | Mintoft (29),<br>2018                   | 2 | 24   | 1            | Spontaneous, PAL                         | Lower<br>limbs,<br>thumb, | Immediately                         | 9 cm <sup>2</sup><br>patches<br>containing        | NS       | 2***<br>5*** | CR<br>Loss of tips<br>of toes                          | Methemoglobinemia<br>Methemoglobinemia |  |
| 41 |                                         |   | 24   | 3, 7         | PAL                                      |                           |                                     |                                                   |          |              |                                                        |                                        |  |
| 42 |                                         |   |      |              |                                          |                           |                                     |                                                   |          |              |                                                        |                                        |  |
| 43 |                                         |   |      |              |                                          |                           |                                     |                                                   |          |              |                                                        |                                        |  |
| 44 |                                         |   |      |              |                                          |                           |                                     |                                                   |          |              |                                                        |                                        |  |
| 45 |                                         |   |      |              |                                          |                           |                                     |                                                   |          |              |                                                        |                                        |  |
| 46 |                                         |   |      |              |                                          |                           |                                     |                                                   |          |              |                                                        |                                        |  |
| 47 |                                         |   |      |              |                                          |                           |                                     |                                                   |          |              |                                                        |                                        |  |



Table 2.

## Assessment of risk of bias of included studies

| Study                    | Joanna Briggs Checklist Criteria |                          |                    |                         |                          |                             |                |                  |
|--------------------------|----------------------------------|--------------------------|--------------------|-------------------------|--------------------------|-----------------------------|----------------|------------------|
|                          | Demographic characteristics      | Patient history/timeline | Clinical condition | Diagnostics/assessments | Interventions/treatments | Condition post-intervention | Adverse events | Takeaway lessons |
| O'Reilly, 1988           |                                  | +                        | +                  | +                       | +                        | +                           | +              | +                |
| Denkler, 1989            | +                                | +                        | +                  | +                       | +                        | +                           | +              | +                |
| Wong, 1992               | +                                | +                        | +                  | +                       | +                        | +                           | +              | +                |
| Varughese, 2001          | +                                | +                        | +                  | +                       | +                        | +                           | +              | +                |
| Baserga, 2002            | +                                | +                        | +                  | +                       | +                        | +                           | +              | +                |
| Vasquez, 2003            | +                                | +                        | +                  | +                       | +                        | +                           | +              | +                |
| Maffei, 2006             | +                                | +                        | +                  | +                       | +                        | +                           | +              | +                |
| Ancora, 2006             | +                                | +                        | +                  | +                       | +                        | +                           | +              | +                |
| Mousavi, 2010            | +                                | +                        | +                  | +                       | +                        | +                           | +              | +                |
| Akingbola, 2012          | +                                | +                        | +                  | +                       | +                        | +                           | +              | +                |
| Mosalli, 2013            | +                                | +                        | +                  | +                       | +                        | +                           | +              | +                |
| Samiee-Zafarghandy, 2014 | +                                | +                        | +                  | +                       | +                        | +                           | +              | +                |
| Dilli, 2015              | +                                | +                        | +                  | +                       | +                        | +                           | +              | +                |
| Teo, 2015                | +                                | +                        | +                  | +                       | +                        | +                           | +              | +                |
| Parra, 2016              | +                                | +                        | +                  | +                       | +                        | +                           | +              | +                |
| Vivar del Hoyo, 2016     | +                                | +                        | +                  | +                       | +                        | +                           | +              | +                |
| Yong, 2016               | +                                | +                        | +                  | +                       | +                        | +                           | +              | +                |
| Han, 2017                | +                                | +                        | +                  | +                       | +                        | +                           | +              | +                |
| Isik, 2017               | +                                | +                        | +                  | +                       | +                        | +                           | +              | +                |
| Mintoft, 2018            | +                                | +                        | +                  | +                       | +                        | +                           | +              | +                |
| Kuttysankaran, 2018      | +                                | +                        | +                  | +                       | +                        | +                           | +              | +                |
| Weeraskera, 2019         | +                                | +                        | +                  | +                       | +                        | +                           | +              | +                |

Contributor's statement for "Topical Nitroglycerin Ointment as Salvage Therapy for Peripheral Tissue Ischemia in Newborn Infants: A Systematic Review"

Please see below for how each of the authors of our manuscript has fulfilled the criteria for authorship of ICMJE:

|                                                                                                                                               | KS | CL | LF | AG | MMA | AKC | JVDA | TLM | SSZ |
|-----------------------------------------------------------------------------------------------------------------------------------------------|----|----|----|----|-----|-----|------|-----|-----|
| Contributed substantially to conception and design, or acquisition of data, or analysis and interpretation of data                            | X  | X  | X  | X  | X   | X   | X    | X   | X   |
| Drafted the article or revised it critically for important intellectual content                                                               | X  | X  | X  | X  | X   | X   | X    | X   | X   |
| Gave final approval of the version to be published                                                                                            | X  | X  | X  | X  | X   | X   | X    | X   | X   |
| Agreed to act as guarantor of the work (ensuring that questions related to any part of the work are appropriately investigated and resolved). | X  | X  | X  | X  | X   | X   | X    | X   | X   |

Katelyn Sushko (KS), Catherine Litalien (CL), Lauren Ferruccio (LF), Andrea Gilpin (AG), Maryann Mazer-Amirshahi (MMA), Anthony K Chan (AKC), John van den Anker (JVDA), Thierry Lacaze-Masmonteil(TLM), Samira Samiee-Zafarghandy (SSZ)
